# Supplementary material for: Cancer risk and survival in path_MMR carriers by gene and gender up to 75 years of age: a report from the Prospective Lynch Syndrome Database
Source: PubMed Central journal article supplement — Gut. 2017 Jul 28;67(7):1306–16. doi: 10.1136/gutjnl-2017-314057 (PMC6031262; doi:10.1136/gutjnl-2017-314057), 2017-07-28
Supplement: gutjnl-2017-314057supp001.pdf [file gutjnl-2017-314057supp001.pdf]

Online Table 2

Follow-up as carried out at each reporting centre and with references for details.

| Centre          | Series censored | Colonoscopy                   |           | Gynecological examination |           |                                                          | References for details                                                                                                                                                                                                                                                                                                                                                                                                                                                                                                                                            |
|-----------------|-----------------|-------------------------------|-----------|---------------------------|-----------|----------------------------------------------------------|-------------------------------------------------------------------------------------------------------------------------------------------------------------------------------------------------------------------------------------------------------------------------------------------------------------------------------------------------------------------------------------------------------------------------------------------------------------------------------------------------------------------------------------------------------------------|
|                 |                 | Interval                      | From-to   | Interval                  | From-to   | Modalities in addition to clinical examination           |                                                                                                                                                                                                                                                                                                                                                                                                                                                                                                                                                                   |
| Norway          | 2013            | 3 years                       | 1989-1996 | 2 years                   | 1989-2013 | TV USS<br>CA125                                          | <a href="http://www.ncbi.nlm.nih.gov/pubmed/17454882">http://www.ncbi.nlm.nih.gov/pubmed/17454882</a><br><a href="http://www.ncbi.nlm.nih.gov/pubmed/18841495">http://www.ncbi.nlm.nih.gov/pubmed/18841495</a>                                                                                                                                                                                                                                                                                                                                                    |
|                 |                 | 2 years (1 year when adenoma) | 1996-2013 |                           |           |                                                          |                                                                                                                                                                                                                                                                                                                                                                                                                                                                                                                                                                   |
| Finland         | 2014            | 3 years                       | 1985-2014 | 1 year                    | 1995-2014 | TV USS<br>Endometrial biopsy,<br>CA125                   | <a href="http://onlinelibrary.wiley.com/doi/10.1002/ijc.22446/pdf">http://onlinelibrary.wiley.com/doi/10.1002/ijc.22446/pdf</a><br><a href="http://www.ncbi.nlm.nih.gov/pubmed/7729632">http://www.ncbi.nlm.nih.gov/pubmed/7729632</a><br><a href="http://www.ncbi.nlm.nih.gov/pubmed/10784581">http://www.ncbi.nlm.nih.gov/pubmed/10784581</a><br><a href="http://www.ncbi.nlm.nih.gov/pubmed/16736288">http://www.ncbi.nlm.nih.gov/pubmed/16736288</a><br><a href="http://www.ncbi.nlm.nih.gov/pubmed/17919485">http://www.ncbi.nlm.nih.gov/pubmed/17919485</a> |
| Sweden          | 2014            | 2 years                       | 1990-2000 | 1 year                    | 1992-2014 | TV USS<br>In most: CA 125<br>In some: endometrial biopsy | <a href="http://www.ncbi.nlm.nih.gov/pubmed/11788565">http://www.ncbi.nlm.nih.gov/pubmed/11788565</a><br><a href="http://www.ncbi.nlm.nih.gov/pubmed/25762374">http://www.ncbi.nlm.nih.gov/pubmed/25762374</a>                                                                                                                                                                                                                                                                                                                                                    |
|                 |                 | 18 months                     | 2000-2014 |                           |           |                                                          |                                                                                                                                                                                                                                                                                                                                                                                                                                                                                                                                                                   |
| Denmark         | 2014            | 2 years                       | 1991-2014 | 2 years                   | 1991-2014 | TV USS                                                   | <a href="http://www.ncbi.nlm.nih.gov/pubmed/18972272">http://www.ncbi.nlm.nih.gov/pubmed/18972272</a><br><a href="http://www.ncbi.nlm.nih.gov/pubmed/24631699">http://www.ncbi.nlm.nih.gov/pubmed/24631699</a><br><a href="http://www.ncbi.nlm.nih.gov/pubmed/17234021">http://www.ncbi.nlm.nih.gov/pubmed/17234021</a>                                                                                                                                                                                                                                           |
| Germany         | 2014            | 1 year                        | 1995-2014 | 1 year                    | 1995-2014 | TV USS                                                   | <a href="http://www.ncbi.nlm.nih.gov/pubmed/19835992">http://www.ncbi.nlm.nih.gov/pubmed/19835992</a><br><a href="http://www.ncbi.nlm.nih.gov/pubmed/15483016">http://www.ncbi.nlm.nih.gov/pubmed/15483016</a><br><a href="http://www.ncbi.nlm.nih.gov/pubmed/16908935">http://www.ncbi.nlm.nih.gov/pubmed/16908935</a>                                                                                                                                                                                                                                           |
| The Netherlands | 2013            | 2-3 years                     | 1987-1996 | 1-2 years                 | 1994-2005 | TV USS                                                   | <a href="http://www.ncbi.nlm.nih.gov/pubmed/7723574">http://www.ncbi.nlm.nih.gov/pubmed/7723574</a><br><a href="http://www.ncbi.nlm.nih.gov/pubmed/20206180">http://www.ncbi.nlm.nih.gov/pubmed/20206180</a>                                                                                                                                                                                                                                                                                                                                                      |
|                 |                 | 2 years                       | 1996-2013 | 1-2 years                 | 2005-2013 | TV USS<br>Pipelle<br>microcurettage                      |                                                                                                                                                                                                                                                                                                                                                                                                                                                                                                                                                                   |
| Newcastle       | 2014            | 2 years                       | 1995-2014 | No fixed                  |           |                                                          |                                                                                                                                                                                                                                                                                                                                                                                                                                                                                                                                                                   |

| UK                  |      |                                                 |                        | policy                             |           |                                         |                                                                                                                                                                                                                                                                                                                     |
|---------------------|------|-------------------------------------------------|------------------------|------------------------------------|-----------|-----------------------------------------|---------------------------------------------------------------------------------------------------------------------------------------------------------------------------------------------------------------------------------------------------------------------------------------------------------------------|
| Manchester UK       | 2014 | 2 years                                         | 1994-2014              | 1 year                             | 1990-2014 | Hysteroscopy<br>Ovarian USS<br>Ca125    | <a href="http://www.ncbi.nlm.nih.gov/pubmed/25213040">http://www.ncbi.nlm.nih.gov/pubmed/25213040</a><br><a href="http://www.ncbi.nlm.nih.gov/pubmed/19526324">http://www.ncbi.nlm.nih.gov/pubmed/19526324</a>                                                                                                      |
| Cardiff UK          | 2013 | 3 years<br>2 years                              | 1991-1994<br>1994-2013 | 1 year                             | 1998-2010 | TV USS<br>CA125 (3 or 4 monthly)        | Unpublished.<br>Colonoscopy 96% compliance with interval.<br>Gynae: only 27% of eligible women had gynae cancer screening.<br>Since 2010 nothing systematic.                                                                                                                                                        |
| Spain               | 2013 | 1-2 years (1 year when age > 40 years)          | 1999-2013              | 1 year                             | 1999-2013 | TV USS                                  | unpublished                                                                                                                                                                                                                                                                                                         |
| Italy               | 2013 | 1-2 years (1 year when age > 40 years; adenoma) | 1990-2013              | 2years (1 years when age > 35yrs.) | 1990-2013 | TV USS<br>Pap test.                     | <a href="http://www.ncbi.nlm.nih.gov/pubmed/23408351">http://www.ncbi.nlm.nih.gov/pubmed/23408351</a><br><a href="http://www.ncbi.nlm.nih.gov/pubmed/9935197">http://www.ncbi.nlm.nih.gov/pubmed/9935197</a><br><a href="http://www.ncbi.nlm.nih.gov/pubmed/8416772">http://www.ncbi.nlm.nih.gov/pubmed/8416772</a> |
| Melbourne Australia | 2014 | Annual                                          | 1990-2014              | Annual                             | 1990-2005 | TV USS<br>Endometrial sampling<br>CA125 | <a href="https://www.nhmrc.gov.au/guidelines-publications/cp106">https://www.nhmrc.gov.au/guidelines-publications/cp106</a><br><a href="https://www.nhmrc.gov.au/guidelines-publications/ext8">https://www.nhmrc.gov.au/guidelines-publications/ext8</a>                                                            |
|                     |      |                                                 |                        |                                    | 2005-     | Risk reducing surgery only              |                                                                                                                                                                                                                                                                                                                     |
