# Supplementary material for: Cancer risk and survival in path_MMR carriers by gene and gender up to 75 years of age: a report from the Prospective Lynch Syndrome Database
Source: PubMed Central journal article supplement — Gut. 2017 Jul 28;67(7):1306–16. doi: 10.1136/gutjnl-2017-314057 (PMC6031262; doi:10.1136/gutjnl-2017-314057), 2017-07-28
Supplement: gutjnl-2017-314057supp002.pdf [file gutjnl-2017-314057supp002.pdf]

**Supplementary table 1.** Prospectively detected cancers by organ and gender.

| Group                                  | ICD9 | Organ                  | Females    | Males      | Total      |
|----------------------------------------|------|------------------------|------------|------------|------------|
| <b>Colorectal cancer</b>               |      |                        |            |            |            |
|                                        | 153  | COLON                  | 143        | 141        | 284        |
|                                        | 154  | RECTUM/SIGMOID         | 32         | 32         | 64         |
| <b>Endometrial and ovarian cancer</b>  |      |                        |            |            |            |
|                                        | 182  | ENDOMETRIUM            | 110        | -          | 110        |
|                                        | 183  | OVARY                  | 27         | -          | 27         |
| <b>Upper gastrointestinal cancers</b>  |      |                        |            |            |            |
|                                        | 151  | STOMACH                | 10         | 18         | 28         |
|                                        | 152  | DUODENUM               | 7          | 10         | 17         |
|                                        | 157  | PANCREAS               | 9          | 8          | 17         |
|                                        | 156  | GALL BLADDER/BILE DUCT | 6          | 7          | 13         |
| <b>Urinary tract cancers</b>           |      |                        |            |            |            |
|                                        | 189  | KIDNEY / URETER        | 26         | 20         | 46         |
|                                        | 188  | URINE BLADDER          | 18         | 11         | 29         |
| <b>Other LS or possible LS cancers</b> |      |                        |            |            |            |
|                                        | 173  | SKIN                   | 27*        | 26*        | 53*        |
|                                        | 185  | PROSTATE               | -          | 29         | 29         |
|                                        | 174  | BREAST                 | 40         | -          | 40         |
|                                        | 191  | BRAIN                  | 5          | 3          | 8          |
| <b>Other cancers</b>                   |      |                        | 24         | 27         | 51         |
| <b>Any</b>                             |      |                        | <b>484</b> | <b>329</b> | <b>813</b> |

\*Skin cancers (including sebaceous carcinomas) are often not reported and numbers may not be trusted, and cumulative incidence was not calculated.
